# Supplementary material for: A chloroplast-inspired nanoplatform for targeting cancer and synergistic photodynamic/photothermal therapy
Source: Royal Society of Chemistry journal article supplement (doi:10.1039/c9bm00762h), 2019-01-01
Supplement: c9bm00762h1.pdf [file c9bm00762h1.pdf]

## **Supporting Information**

# **Chloroplast-inspired Nanoplatfom for Targeting Cancer and Synergistic Photodynamic/Photothermal therapy**

Zhengxi Guo, Xiaohong Zhou, Cheng Hou, Zhaoyang Ding, Changchun Wen, Lai-Jun Zhang, Bang-Ping Jiang, and Xing-Can Shen\*

State Key Laboratory for Chemistry and Molecular Engineering of Medicinal Resources, School of Chemistry and Pharmaceutical Science, Guangxi Normal University, Guilin, 541004, P. R. China.

\*Corresponding author. Email: [xcshen@mailbox.gxnu.edu.cn](mailto:xcshen@mailbox.gxnu.edu.cn)

## Table of Contents

|                  |                                                                                    |     |
|------------------|------------------------------------------------------------------------------------|-----|
| <b>Fig. S1.</b>  | The Structure of Cu(II)Chl, PEG-Diamine, HA.                                       | S1  |
| <b>Fig. S2.</b>  | Conjugation efficiency of Cu(II)Chl into Cu(II)Chl-HA NPs.                         | S2  |
| <b>Fig. S3.</b>  | Concentration-dependent absorbance curve.                                          | S3  |
| <b>Fig. S4.</b>  | TEM Diameter Distribution of Cu(II)Chl-HA NPs.                                     | S4  |
| <b>Fig. S5.</b>  | DLS results of Cu(II)Chl-HA NPs.                                                   | S5  |
| <b>Fig. S6.</b>  | Digital photographs of Cu(II)Chl-HA in different media.                            | S6  |
| <b>Fig. S7.</b>  | Time-dependent absorption spectra of Cu(II)Chl-HA in different media.              | S7  |
| <b>Fig. S8.</b>  | Time-dependent average hydrodynamic size plots of Cu(II)Chl-HA in different media. | S8  |
| <b>Fig. S9.</b>  | Frontier molecular orbital distribution.                                           | S9  |
| <b>Table S1.</b> | Triplet and singlet excitation energy.                                             |     |
| <b>Fig. S10.</b> | ROS evaluation by DPBF method.                                                     |     |
| <b>Fig. S11.</b> | <sup>1</sup> O <sub>2</sub> generated investigation.                               |     |
| <b>Fig. S12.</b> | Cellular uptake assay by ICP-OES.                                                  |     |
| <b>Table S2.</b> | Literature comparison of light power for photodynamic therapy.                     |     |
| <b>Fig. S13.</b> | Plots of Cu contents into Cu(II)Chl-HA NPs.                                        |     |
| <b>Fig. S14.</b> | Digital IR thermal imaging in vivo.                                                |     |
| <b>Fig. S15.</b> | Digital photograph of harvested tumors.                                            |     |
| <b>Fig. S16.</b> | Average weight changing curve.                                                     |     |
| <b>Fig. S17.</b> | Histological H&E staining assay.                                                   |     |
|                  |                                                                                    | S17 |

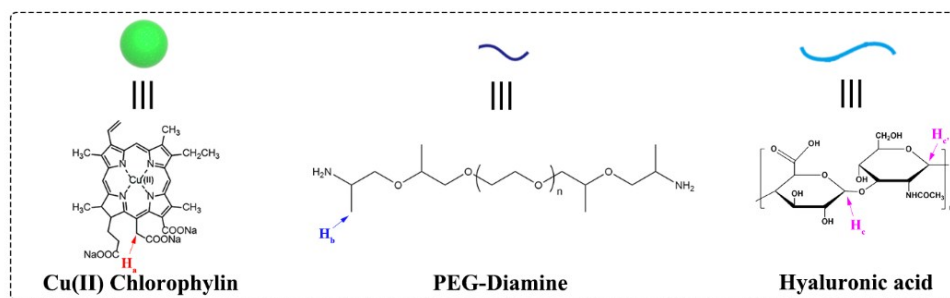

**Fig. S1.** The chemical structure of Cu(II)Chlorophyllin, PEG-Diamine, HA, insert: corresponding typical characteristic proton.

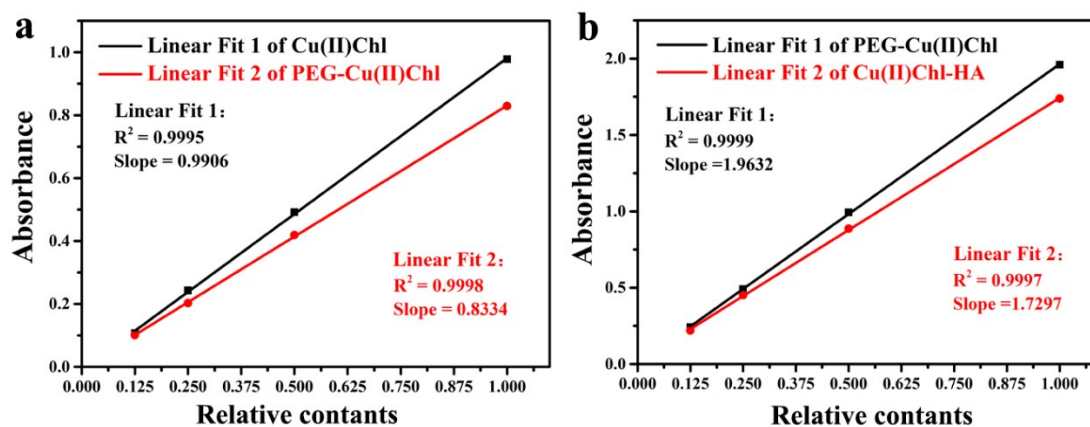

**Fig. S2.** Conjugation efficiency of Cu(II)Chl into Cu(II)Chl-HA NPs, (a) the absorbance of reactant (sodium Cu(II)Chl) and product (PEG-Cu(II)Chl) in accordant dilute aqueous condition, (b) the absorbance of reactant (PEG-Cu(II)Chl) and product (Cu(II)Chl-HA) in accordant dilute aqueous condition.

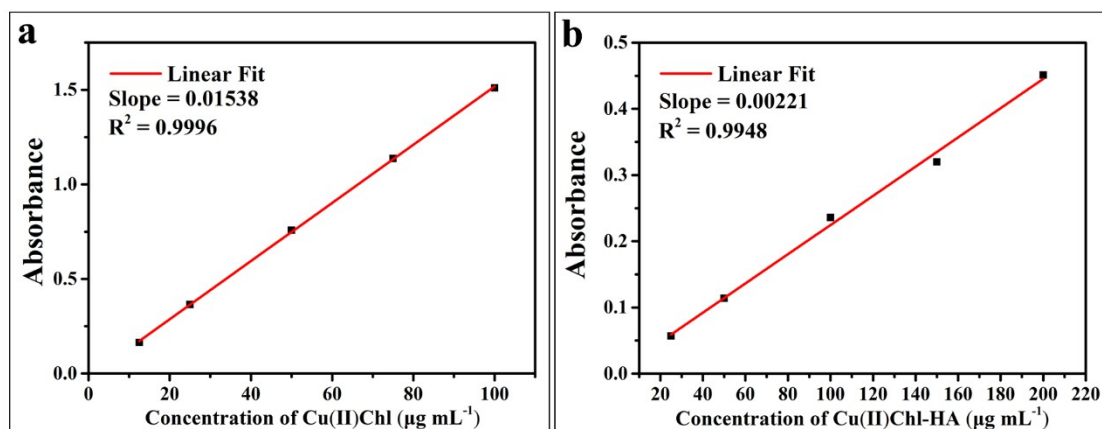

**Fig. S3.** Concentration-dependent absorbance standard curve of (a) Cu(II)Chl and (b) the Cu(II)Chl-HA NPs.

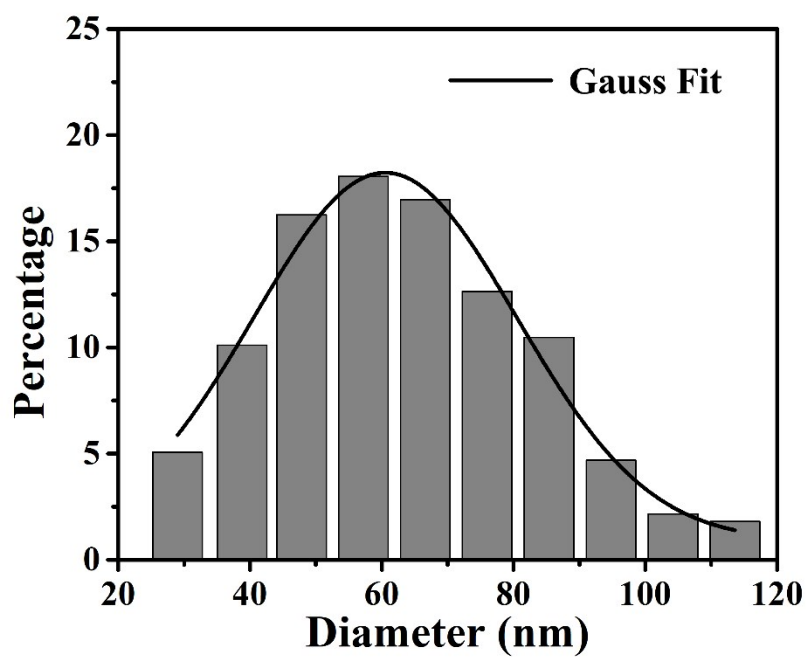

**Fig. S4.** Corresponding TEM diameter distribution of Cu(II)Chl-HA NPs with gauss fitting curve.

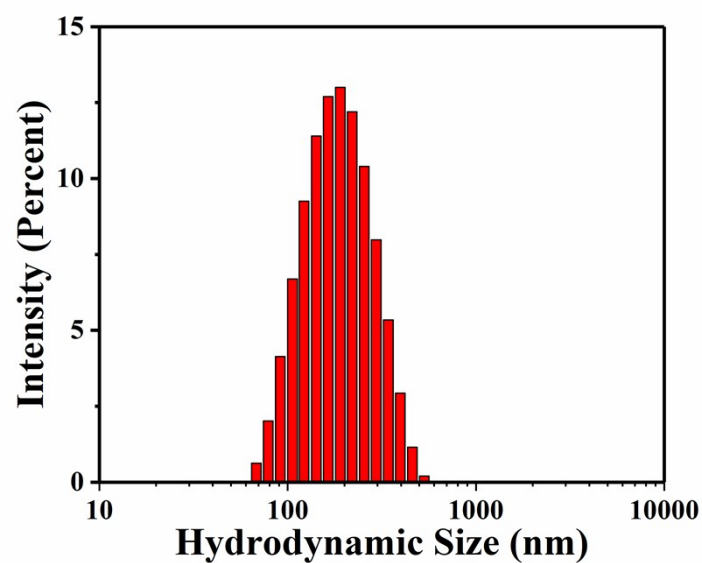

**Fig. S5.** Hydrodynamic size distribution of Cu(II)Chl-HA NPs.

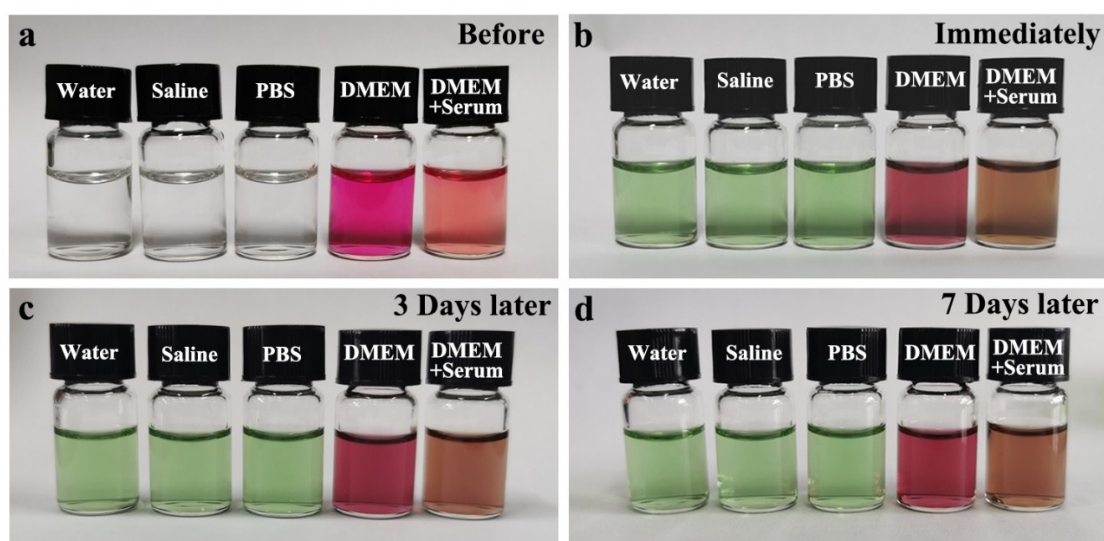

**Fig. S6** Time-dependent digital photographs of Cu(II)Chl-HA NPs that dispersed in different media.

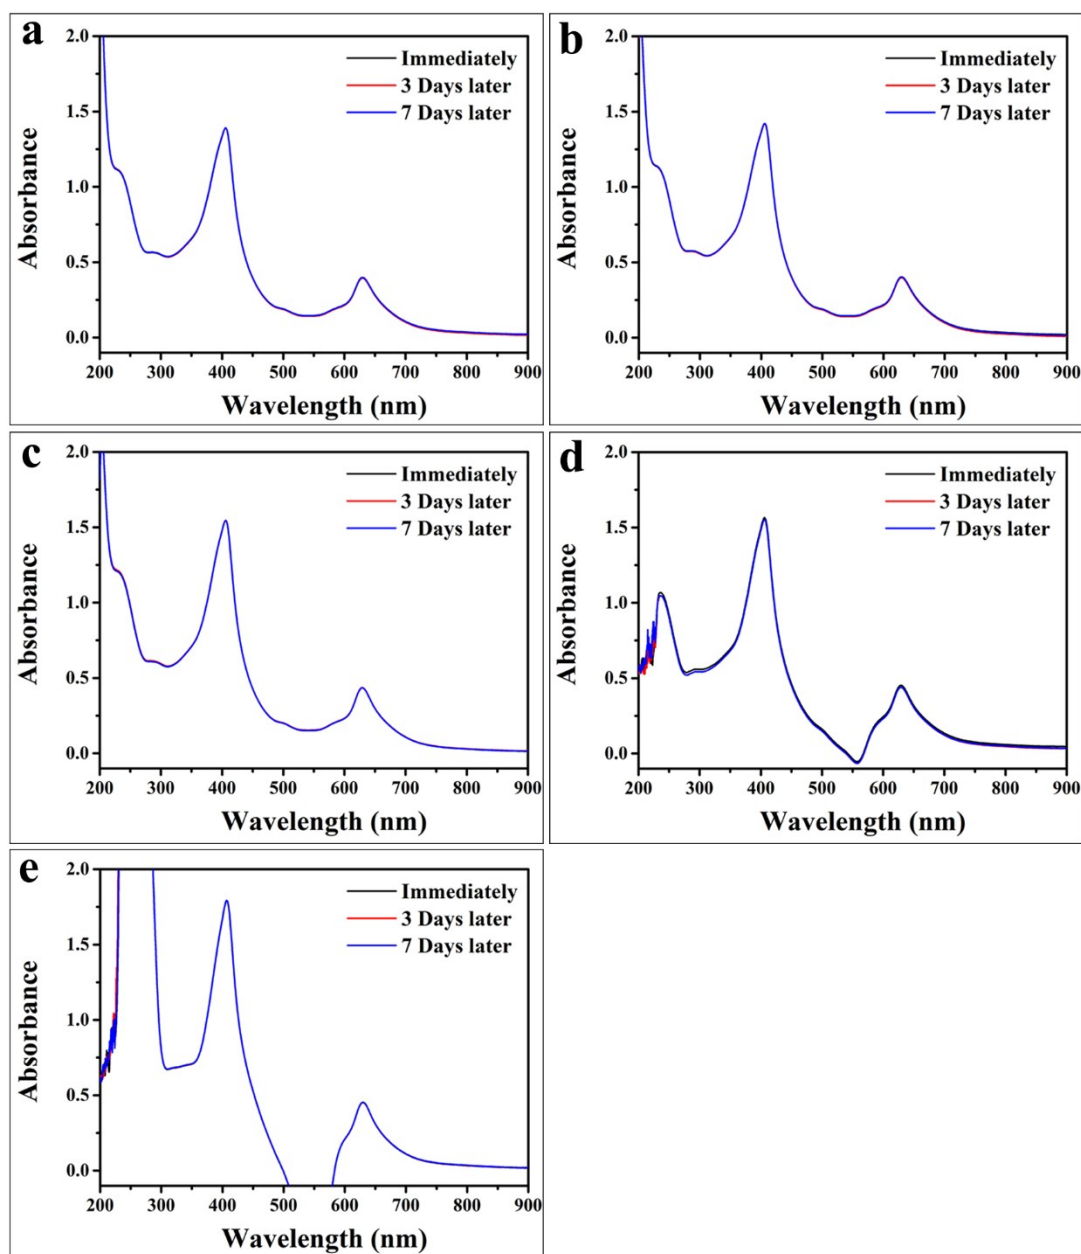

**Fig. S7.** Time-dependent UV-vis-NIR spectra of Cu(II)Chl-HA NPs that dispersed into (a) water, (b) saline, (c) PBS, (d) DMEM, and (e) DMEM + serum.

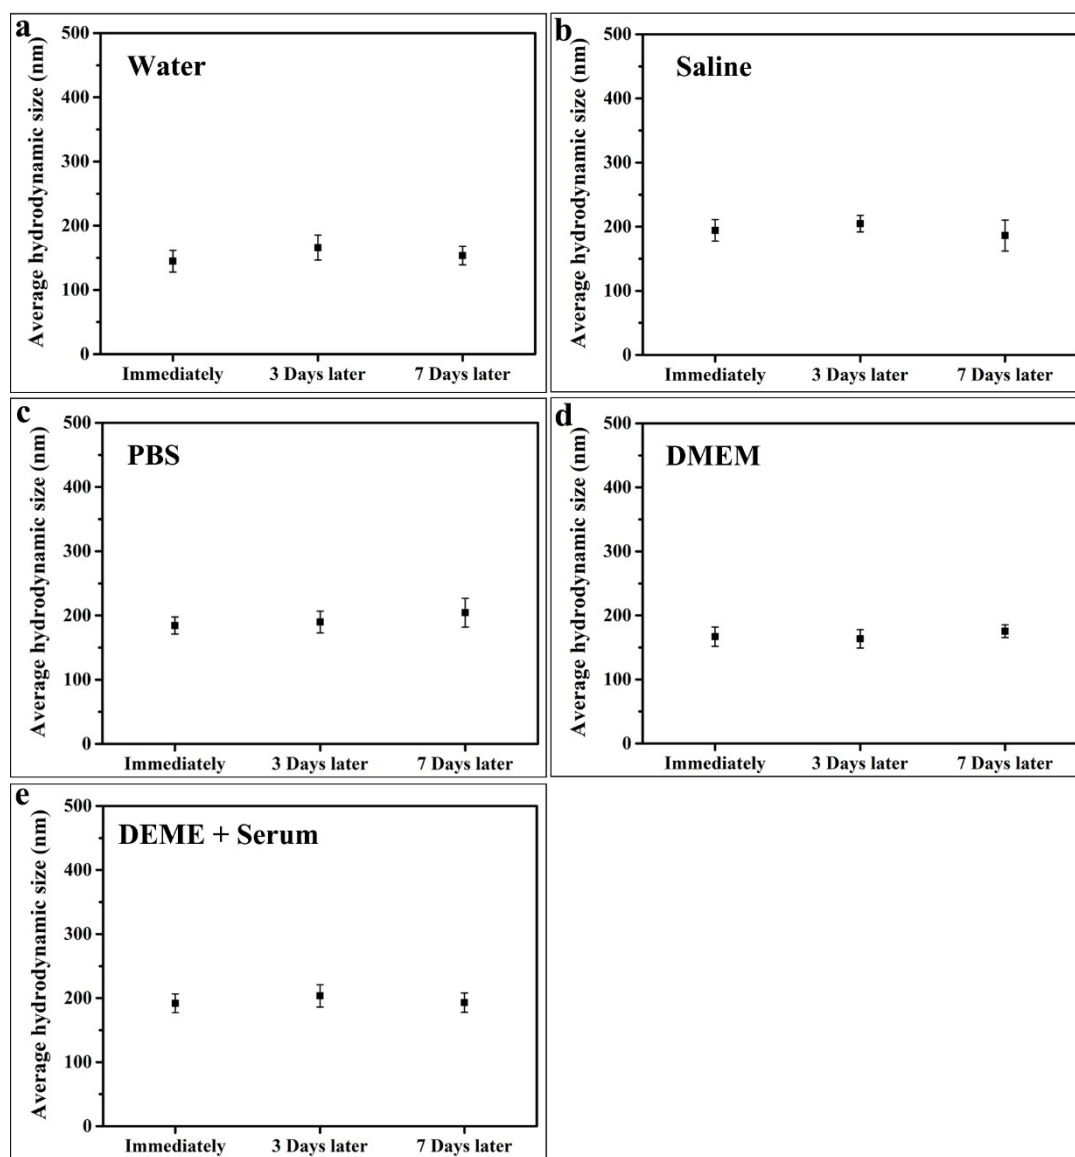

**Fig. S8.** Time-dependent average hydrodynamic size plots of Cu(II)Chl-HA NPs that dispersed into (a) water, (b) saline, (c) PBS, (d) DMEM, and (e) DMEM + serum.

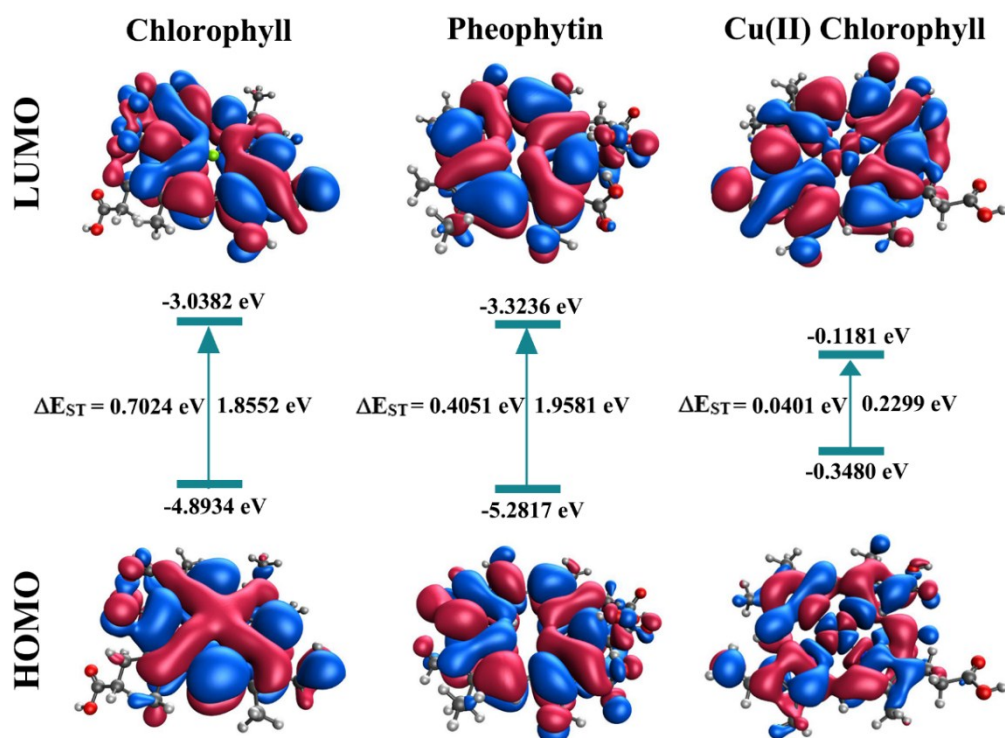

**Fig. S9.** Frontier molecular orbital distribution of chlorophyll, pheophytin, and Cu(II) Chlorophyll.

**Table S1.** Triplet and singlet excitation energy of pheophytin, chlorophyll, and Cu(II) chlorophyll calculated by TD-DFT at the B3LYP/6-31G (d) level.

|                    | State | E(eV)  | $\Delta E_{ST}$ (eV) |
|--------------------|-------|--------|----------------------|
| Pheophytin         | S1    | 2.1515 | 0.4051               |
|                    | S2    | 2.2812 |                      |
|                    | T1    | 1.7464 |                      |
|                    | T2    | 1.8993 |                      |
| Chlorophyll        | S1    | 2.1613 | 0.7024               |
|                    | S2    | 2.1706 |                      |
|                    | T1    | 1.4589 |                      |
|                    | T2    | 1.6244 |                      |
| Cu(II) Chlorophyll | S1    | 0.6043 | 0.0401               |
|                    | S2    | 0.7155 |                      |
|                    | T1    | 0.5642 |                      |
|                    | T2    | 1.3729 |                      |



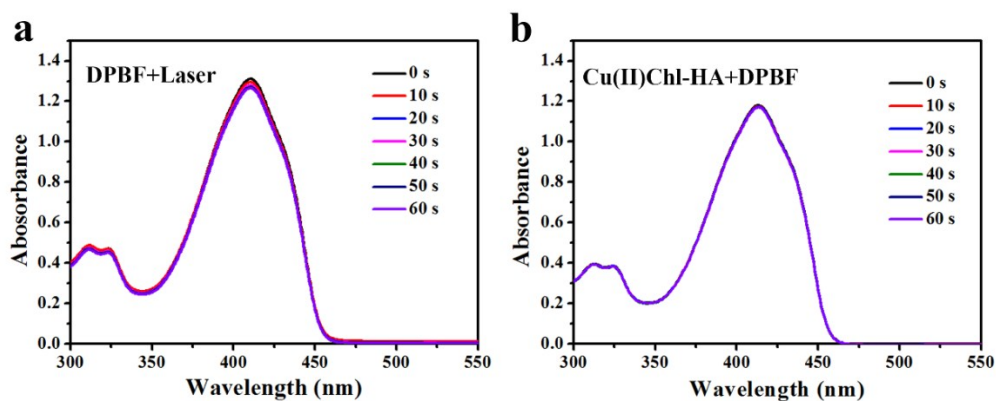

**Fig. S10.** UV-vis spectra of (a) DPBF + Laser and (b) Cu(II)Chl-HA + DPBF with different irradiation times, respectively.

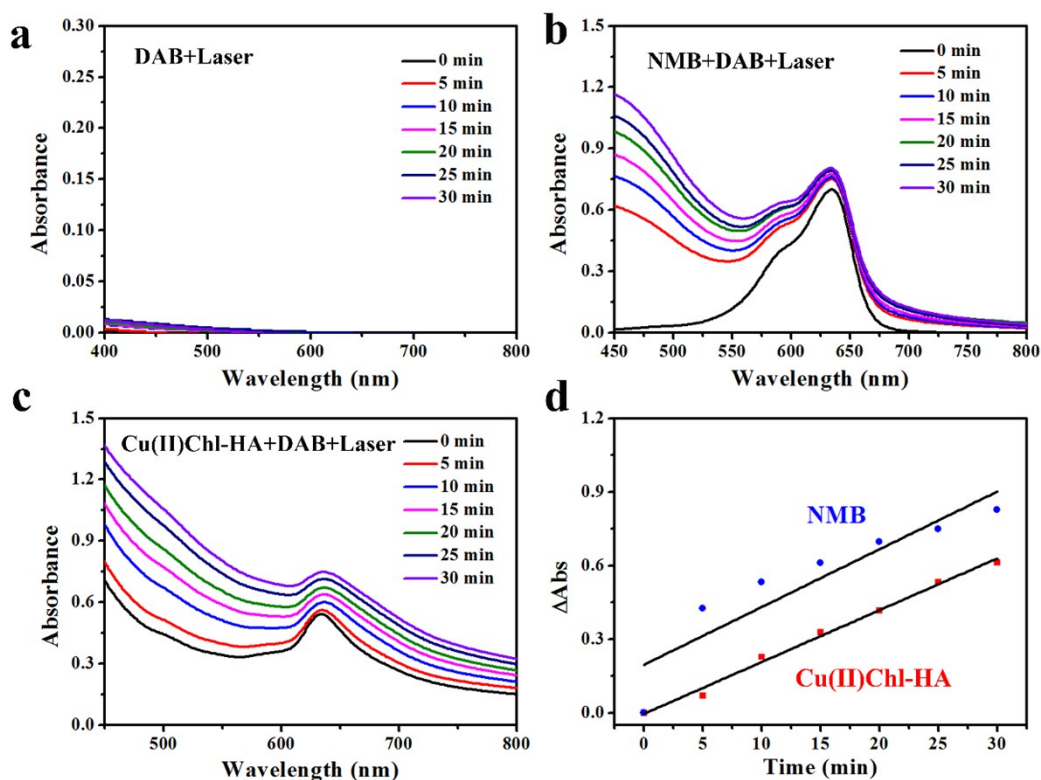

**Fig. S11.** UV-vis spectra of (a) DAB + Laser, (b) NMB+DAB+Laser, (c) Cu(II)Chl-HA + DAB + Laser with different irradiation times, respectively. (d) The corresponding absorption variations of the DAB solution at 500 nm. [DAB] = 500  $\mu$ M.

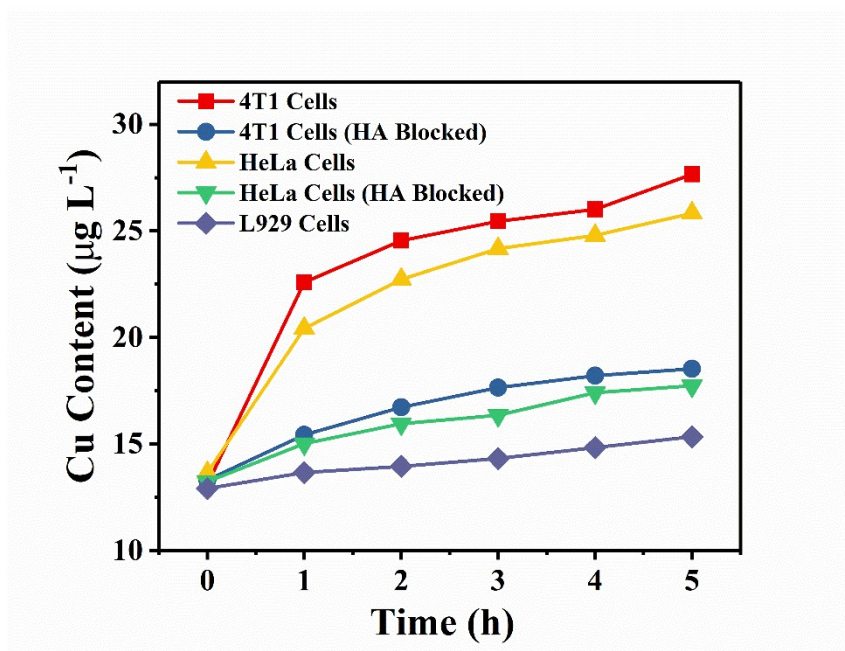

**Fig. S12.** Time-dependent Cu content of Cu(II)Chl-HA (200  $\mu\text{g mL}^{-1}$ ) accumulation in L929, 4T1 and HeLa cells with or without free HA blocked at different incubation time from 0 to 5 h by ICP-OES analysis, respectively.

**Table S2.** Recent works of power density for photodynamic therapy.

| Citations | Substance                        | Laser  | Power density<br>(Note: 1 W = 1 J s) |
|-----------|----------------------------------|--------|--------------------------------------|
| This work | Cu(II)Chl-HA NPs                 | 650 nm | 1.0 W $\text{cm}^{-2}$               |
| Ref 59    | HAuNs-p(OEGMAco-MEMA) composites | 650 nm | 0.75 W $\text{cm}^{-2}$              |
| Ref 60    | PC@SWNHs                         | 650 nm | 1.0 W $\text{cm}^{-2}$               |
| Ref 61    | PDPC micelles                    | 655 nm | 2 W $\text{cm}^{-2}$                 |
| Ref 62    | DAA NPs                          | 660 nm | 0.8 W $\text{cm}^{-2}$               |
| Ref 63    | PS@chol-BSA NPs                  | 671 nm | 1.5 J $\text{cm}^{-2}$               |
| Ref 64    | GV-Ce6                           | 671 nm | 2 W $\text{cm}^{-2}$                 |

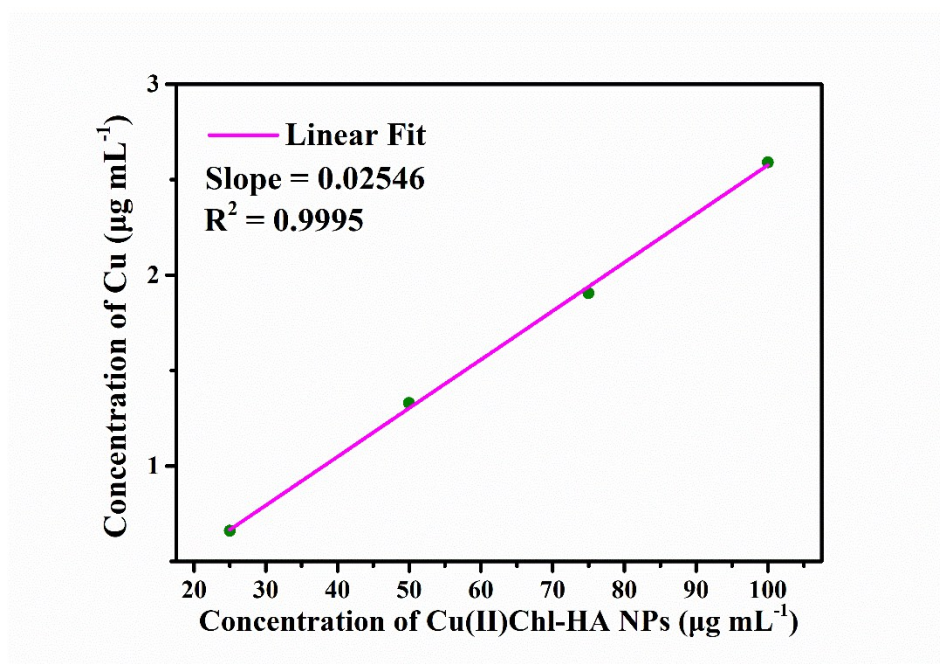

**Fig. S13.** Plots of Cu contents into Cu(II)Chl-HA NPs with gradient concentration measured by ICP-OES.

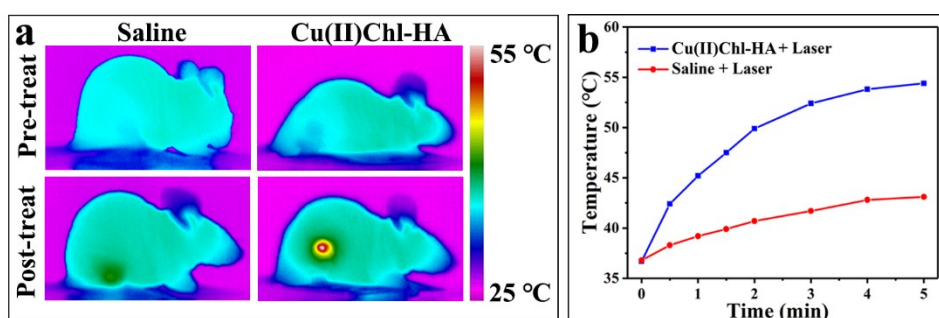

**Fig. S14.** (a) Digital IR thermal photographs of the 4T1 tumor-bearing mouse after intravenously injection of Cu(II)Chl-HA solution or PBS pre and post irradiation for 5 minutes. (b) Temperature changing curve at solid tumor site in five minutes laser irradiation.

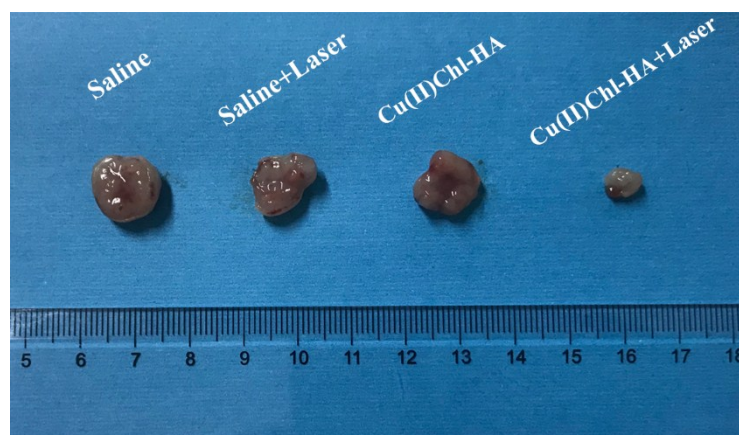

**Fig. S15.** Digital photograph of representatively harvested tumors.

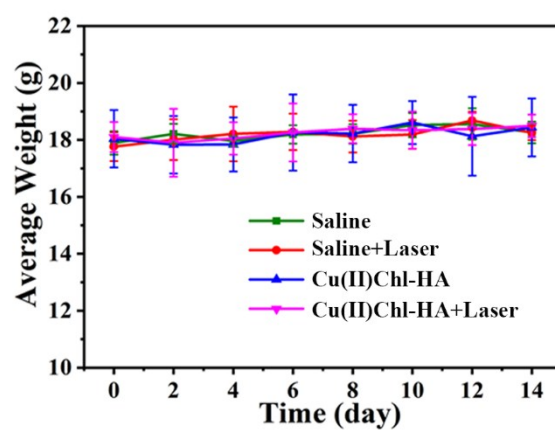

**Fig. S16.** Average weight changing curve of 4T1 tumor-bearing mouse after different treatments for 14 days.



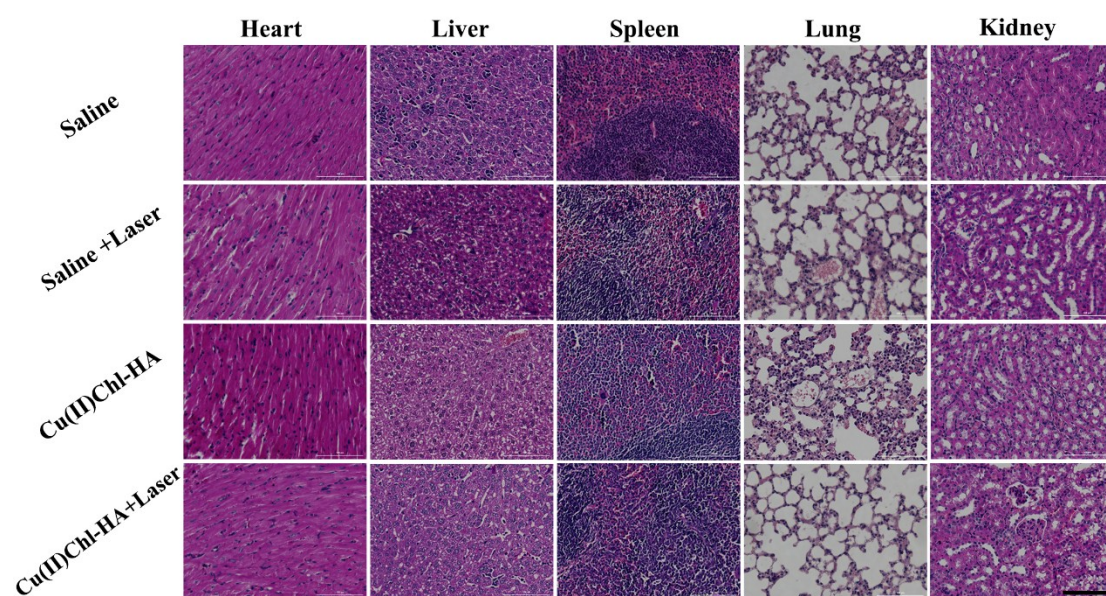

**Fig. S17.** Histological H&E staining experiment of heart, liver, spleen, lung, and kidney in different condition after 14 days treatments, bar: 100  $\mu\text{m}$ .
